# Supplementary material for: Short-term Preoperative Dietary Restriction Is Neuroprotective in a Rat Focal Stroke Model
Source: PubMed Central journal article supplement (PMC3976327; doi:10.1371/journal.pone.0093911), 2014-04-04
Supplement: pone.0093911.s004.pdf [file pone.0093911.s004.pdf]

**Supplementary Table 1:****Gene symbols and names**

| <b>Gene symbol</b> | <b>Gene name</b> |
|--------------------|------------------|
|--------------------|------------------|

**Neurotrophic and growth factors**

|       |                                                     |
|-------|-----------------------------------------------------|
| BDNF  | brain-derived neurotrophic factor                   |
| CDNF  | cerebral dopamine neurotrophic factor               |
| CNTF  | ciliary neurotrophic factor                         |
| FGF2  | fibroblast growth factor 2                          |
| GDNF  | glial cell line-derived neurotrophic factor         |
| IGF1  | insulin-like growth factor 1                        |
| MANF  | mesencephalic astrocyte-derived neurotrophic factor |
| NGF   | nerve growth factor                                 |
| NRG1  | neuregulin 1                                        |
| NRTN  | neurturin                                           |
| PSPN  | persephin                                           |
| TGFB1 | transforming growth factor, beta 1                  |

**Neurotrophic and growth factor receptors**

|            |                                                                    |
|------------|--------------------------------------------------------------------|
| GFRA1      | GDNF family receptor, alpha 1                                      |
| GFRA2      | GDNF family receptor, alpha 2                                      |
| NTRK2/TRKB | neurotrophic tyrosine kinase, receptor, type 2 / tyrosine kinase B |
| RET        | ret proto-oncogene                                                 |
| TGFBR1     | transforming growth factor, beta receptor 1                        |
| TGFBR2     | transforming growth factor, beta receptor 2                        |
| TGFBR3     | transforming growth factor, beta receptor 3                        |

**Inflammatory response**

|          |                                                       |
|----------|-------------------------------------------------------|
| ICAM1    | intercellular adhesion molecule 1                     |
| TNFA     | tumor necrosis factor, alpha                          |
| TNFRSF1A | tumor necrosis factor receptor superfamily, member 1A |
| VCAM1    | vascular cell adhesion molecule 1                     |

**Cellular stress response**

|              |                                                                                                                 |
|--------------|-----------------------------------------------------------------------------------------------------------------|
| APOE         | apolipoprotein E                                                                                                |
| GPX1         | glutathione peroxidase 1                                                                                        |
| GSTO1        | glutathione S-transferase, omega 1                                                                              |
| HMOX1        | heme oxygenase (decycling) 1                                                                                    |
| HMOX2        | heme oxygenase (decycling) 2                                                                                    |
| HSPA4/HSP70  | heat shock 70 kDa protein 4 / heat shock protein, 70 kDa                                                        |
| HSPA5/GRP78  | heat shock 70 kDa protein 5 / glucose-regulated protein, 78 kDa                                                 |
| PTGS2/COX2   | prostaglandin-endoperoxide synthase 2 / cyclooxygenase 2                                                        |
| SLC1A3/GLAST | solute carrier family 1 (glial high affinity glutamate transporter), member 3 / glutamate-aspartate transporter |
| SOD1         | superoxide dismutase 1, soluble                                                                                 |
| SOD2         | superoxide dismutase 2, mitochondrial                                                                           |

**Gene symbols and names**

| <b>Gene symbol</b> | <b>Gene name</b> |
|--------------------|------------------|
|--------------------|------------------|

**Cell death**

|         |                                                                        |
|---------|------------------------------------------------------------------------|
| APAF1   | apoptotic peptidase activating factor 1                                |
| BCL2L11 | B-cell CLL/lymphoma 2 (BCL2)-like 11 / bcl-2 interacting protein (BIM) |
| FADD    | Fas (TNFRSF6)-associated via death domain                              |
| HIF1A   | hypoxia inducible factor 1, alpha subunit                              |
| JUN     | jun proto-oncogene                                                     |
| RALBP1  | ralA binding protein 1                                                 |
| SIRT1   | sirtuin 1                                                              |
| TRADD   | TNFRSF1A-associated via death domain                                   |
| XIAP    | X-linked inhibitor of apoptosis                                        |

**Housekeeping reference gene**

|      |                            |
|------|----------------------------|
| PPIA | peptidylprolyl isomerase A |
|------|----------------------------|

**Supplementary Table 1:****Primer sequences**

| <b>Gene symbol</b>                              | <b>Forward primer</b>            | <b>Reverse primer</b>          |
|-------------------------------------------------|----------------------------------|--------------------------------|
| <b>Neurotrophic and growth factors</b>          |                                  |                                |
| BDNF                                            | 5'-CGTGGGGAGCTGAGCGTGTG-3'       | 5'-GCCCTGCAGCCTTCCTTCG-3'      |
| CDFN                                            | 5'-TCGAGGGCTGACTGTGAAGTATGCAA-3' | 5'-AGCACAGGCGGTTTTCTTTCCCT-3'  |
| CNTF                                            | 5'-GACCTGACTGCTCTTATGGAATCT-3'   | 5'-GCCTGGAGGTTCTCTTGGA-3'      |
| FGF2                                            | 5'-AAGAGCGACCCACACGTC-3'         | 5'-CCCTTGATGGACACAACCTCC-3'    |
| GDNF                                            | 5'-GAGACCGGATCCGAGGTGCC-3'       | 5'-GAGGAAGTGCCGCCGCTTGT-3'     |
| IGF1                                            | 5'-TGACATGCCCAAGACTCAGA-3'       | 5'-CGTGGCATTCTTCTGTTCCCTC-3'   |
| MANF                                            | 5'-GGCAAAGAAAATCGGTTGTG-3'       | 5'-CTTCTCCACAGGGATATGGTG-3'    |
| NGF                                             | 5'-GGCCACTCTGAGGTGCATAGCG-3'     | 5'-AGGTGGGTGGAGGCTGGGTG-3'     |
| NRG1                                            | 5'-CTCTGCCAACATCACCATTG-3'       | 5'-TTTCTCTTCTCCGCACACT-3'      |
| NRTN                                            | 5'-TCTGCTCTTGGGTACCCGCT-3'       | 5'-AGCAGAGCGCGATACTGGGC-3'     |
| PSPN                                            | 5'-AAGCCCCATCAGGGTAAACA-3'       | 5'-CCGGCACAAACCAGGTAA-3'       |
| TGFB1                                           | 5'-CCTGGAAAGGGCTCAACAC-3'        | 5'-CAGTTCTTCTCTGTGGAGCTGA-3'   |
| <b>Neurotrophic and growth factor receptors</b> |                                  |                                |
| GFRA1                                           | 5'-GTACTTCGCGTGCCACT-3'          | 5'-GCTTTCACACAGTCCAGACG-3'     |
| GFRA2                                           | 5'-GTCATCACCCACCTGCACATC-3'      | 5'-AGCATGCTTAACTCTTTGGA-3'     |
| NTRK2                                           | 5'-CGAGGTTGGAACCTAACAGC-3'       | 5'-CCTTTTCTGGTTTGCAATGAG-3'    |
| RET                                             | 5'-CTGGGAGCAGCTCAGCAT-3'         | 5'-TGTGGACCCCAGGAAGAC-3'       |
| TGFBR1                                          | 5'-AAGGCCAAATATCCCAACA-3'        | 5'-ATTTTGGCCATCACTCTCAAG-3'    |
| TGFBR2                                          | 5'-GAGGACGGCCTGAAATCC-3'         | 5'-CTCACACACGATCTGGATGC-3'     |
| TGFBR3                                          | 5'-TGTGGTACATCTACTCCACACA-3'     | 5'-GCGAGGTAGGGACTTGCTG-3'      |
| <b>Inflammatory response</b>                    |                                  |                                |
| ICAM1                                           | 5'-GCAGACCACTGTGCTTTGAG-3'       | 5'-TCCAGCTCCACTCGCTCT-3'       |
| TNFA                                            | 5'-GCCCAGACCCTCACACTC-3'         | 5'-CCACTCCAGCTGCTCCTCT-3'      |
| TNFRSF1A                                        | 5'-AATGAGTGCACCCCTTGC-3'         | 5'-CCTGGGGGTTTGTGACATT-3'      |
| VCAM1                                           | 5'-CAAATGGAGTCTGAACCCAAA-3'      | 5'-GGTCTTTTCGGAGCAACG-3'       |
| <b>Cellular stress response</b>                 |                                  |                                |
| APOE                                            | 5'-GGATGCCTGGCCGAGGGAGA-3'       | 5'-ACCGTCAGTTCCTGTGTGACTTGG-3' |
| GPX1                                            | 5'-CGACATCGAACCCGATATAGA-3'      | 5'-ATGCCTTAGGGGTTGTAGG-3'      |
| GSTO1                                           | 5'-AGGAGCCTGGGGAAGGGAAGC-3'      | 5'-ACCAGAGACGGCACCTTTGAGA-3'   |
| HMOX1                                           | 5'-GTCAAGCACAGGGTGACAGA-3'       | 5'-CTGCAGCTCCTCAAACAGC-3'      |
| HMOX2                                           | 5'-TACGGCACCCAGAAAAGGAAA-3'      | 5'-GTGCTTCTTGGTCCCTTC-3'       |
| HSPA4                                           | 5'-AGCTGAAGAGGGGTCAAGTG-3'       | 5'-TTTGGAGAAAAGGAGCAGCAT-3'    |
| HSPA5                                           | 5'-CCGTAACAATCAAGGTCTACGA-3'     | 5'-AAGGTGACTTCAATCTGGGGTA-3'   |
| PTGS2                                           | 5'-CTACACCAGGGCCCTTCC-3'         | 5'-TCCAGAACTTCTTTGAATCAGG-3'   |
| SLC1A3                                          | 5'-TGGTAGCGGTGATAATGTGG-3'       | 5'-ATCTTCCCTGCGATCAAGAA-3'     |
| SOD1                                            | 5'-CGAGCAGAAGGCAAGCGGTGA-3'      | 5'-TCGTGGACCACCATAGTACGGC-3'   |
| SOD2                                            | 5'-TGGACAAACCTGAGCCCTAA-3'       | 5'-GACCCAAAGTCACGCTTGATA-3'    |
| <b>Primer sequences</b>                         |                                  |                                |
| <b>Gene symbol</b>                              | <b>Forward primer</b>            | <b>Reverse primer</b>          |
| <b>Cell death</b>                               |                                  |                                |
| APAF1                                           | 5'-CCTGCTCAGTGGATAAGAAAGTTA-3'   | 5'-TGAGTGTCTTTCGTAGGTGTGC-3'   |
| BCL2L1                                          | 5'-AGATCTGCGCCAGAGATAC-3'        | 5'-CTTCCGCTCTCGGTAATC-3'       |
| FADD                                            | 5'-CTACTGCAGCGCCTGGAC-3'         | 5'-CCCCACATTGTACACACA-3'       |
| HIF1A                                           | 5'-AAGCACTAGACAAAGCTCACCTG-3'    | 5'-TTGACCATATCGCTGTCCAC-3'     |
| JUN                                             | 5'-GGCTGCAGGCGCTGAAGGAA-3'       | 5'-TCCTCTAGCCGGGCGATCCG-3'     |
| RALBP1                                          | 5'-GGCGGCAGGCACTGGTGTA-3'        | 5'-GGCAGCGTAGCCTCAGTCC-3'      |
| SIRT1                                           | 5'-TCCTTTCAGAACCCAAAGCGG-3'      | 5'-CCGGGAAGTCCACAGCAAGGC-3'    |
| TRADD                                           | 5'-CTGGAGGAGAACGAGCTCAC-3'       | 5'-GAGTCCAGTGGATGGCAAT-3'      |
| XIAP                                            | 5'-GCTTGCAAGAGCTGGATTTT-3'       | 5'-TGGCTTCCAATCCGTGAG-3'       |
| <b>Housekeeping reference gene</b>              |                                  |                                |
| PPIA                                            | 5'-TATCTGCACTGCCAAGACTGAGTG-3'   | 5'-CTTCTTGCTGGTCTTGCCATTCC-3'  |

**Supplementary Table 1:**

**Fold change normalized to AL 0h**

| Gene symbol                                     | AL 0h |       |       |       | Sham   |       |        |       | tMCAO    |       |          |       |          |       |          |       |
|-------------------------------------------------|-------|-------|-------|-------|--------|-------|--------|-------|----------|-------|----------|-------|----------|-------|----------|-------|
|                                                 | AL 0h |       | FA 0h |       | AL 24h |       | FA 24h |       | AL 24h L |       | AL 24h R |       | FA 24h L |       | FA 24h R |       |
|                                                 | avg   | sem   | avg   | sem   | avg    | sem   | avg    | sem   | avg      | sem   | avg      | sem   | avg      | sem   | avg      | sem   |
| <b>Neurotrophic and growth factors</b>          |       |       |       |       |        |       |        |       |          |       |          |       |          |       |          |       |
| BDNF                                            | 1     | 0.448 | 1.039 | 0.364 | 0.500  | 0.206 | 0.431  | 0.161 | 0.520    | 0.256 | 16.82    | 12.52 | 6.088    | 2.698 | 2.949    | 2.115 |
| CDNF                                            | 1     | 0.200 | 0.882 | 0.126 | 0.758  | 0.104 | 0.797  | 0.110 | 0.364    | 0.087 | 0.409    | 0.085 | 0.829    | 0.116 | 0.759    | 0.091 |
| CNTF                                            | 1     | 0.333 | 1.002 | 0.281 | 0.563  | 0.062 | 0.543  | 0.067 | 0.781    | 0.145 | 1.144    | 0.279 | 1.130    | 0.609 | 1.283    | 0.421 |
| FGF2                                            | 1     | 0.101 | 1.261 | 0.117 | 0.986  | 0.086 | 1.063  | 0.077 | 1.779    | 0.367 | 5.687    | 0.404 | 1.749    | 0.328 | 2.674    | 0.482 |
| GDNF                                            | 1     | 0.094 | 0.889 | 0.070 | 0.990  | 0.089 | 0.927  | 0.095 | 1.350    | 0.243 | 2.064    | 0.370 | 0.885    | 0.132 | 0.901    | 0.127 |
| IGF1                                            | 1     | 0.124 | 0.949 | 0.123 | 0.912  | 0.088 | 0.863  | 0.121 | 1.029    | 0.218 | 1.410    | 0.358 | 1.312    | 0.347 | 1.452    | 0.166 |
| MANF                                            | 1     | 0.049 | 0.939 | 0.047 | 1.038  | 0.061 | 0.989  | 0.047 | 1.156    | 0.187 | 2.058    | 0.173 | 1.155    | 0.109 | 1.473    | 0.230 |
| NGF                                             | 1     | 0.200 | 0.673 | 0.093 | 0.516  | 0.120 | 0.489  | 0.078 | 0.692    | 0.211 | 0.774    | 0.151 | 0.383    | 0.088 | 0.867    | 0.383 |
| NRG1                                            | 1     | 0.140 | 0.745 | 0.061 | 0.724  | 0.158 | 0.766  | 0.145 | 0.517    | 0.144 | 0.337    | 0.109 | 0.721    | 0.119 | 0.549    | 0.308 |
| NRTN                                            | 1     | 0.158 | 0.844 | 0.078 | 0.942  | 0.120 | 0.940  | 0.136 | 1.082    | 0.039 | 6.354    | 1.153 | 1.116    | 0.208 | 2.885    | 1.121 |
| PSPN                                            | 1     | 0.300 | 0.564 | 0.076 | 0.765  | 0.082 | 0.722  | 0.119 | 0.868    | 0.296 | 0.938    | 0.310 | 0.672    | 0.209 | 1.027    | 0.112 |
| TGFB1                                           | 1     | 0.140 | 0.789 | 0.059 | 0.866  | 0.084 | 0.788  | 0.041 | 0.851    | 0.029 | 5.305    | 0.794 | 1.326    | 0.318 | 1.839    | 0.581 |
| <b>Neurotrophic and growth factor receptors</b> |       |       |       |       |        |       |        |       |          |       |          |       |          |       |          |       |
| GFRA1                                           | 1     | 0.187 | 0.959 | 0.097 | 1.091  | 0.231 | 0.849  | 0.085 | 1.062    | 0.151 | 2.859    | 0.305 | 1.438    | 0.278 | 1.856    | 0.365 |
| GFRA2                                           | 1     | 0.143 | 2.398 | 1.527 | 0.685  | 0.046 | 1.036  | 0.279 | 0.791    | 0.113 | 0.843    | 0.368 | 1.857    | 1.196 | 0.867    | 0.339 |
| NTRK2                                           | 1     | 0.042 | 1.215 | 0.212 | 1.082  | 0.101 | 1.421  | 0.105 | 1.623    | 0.079 | 1.599    | 0.379 | 1.992    | 0.738 | 1.250    | 0.383 |
| RET                                             | 1     | 0.170 | 1.248 | 0.239 | 0.898  | 0.058 | 1.096  | 0.114 | 1.658    | 0.298 | 4.345    | 0.869 | 1.841    | 0.239 | 3.835    | 1.161 |
| TGFBR1                                          | 1     | 0.149 | 0.633 | 0.081 | 0.909  | 0.087 | 0.816  | 0.069 | 0.917    | 0.136 | 1.864    | 0.182 | 0.998    | 0.137 | 1.335    | 0.257 |
| TGFBR2                                          | 1     | 0.145 | 0.835 | 0.097 | 1.393  | 0.302 | 1.250  | 0.237 | 1.067    | 0.092 | 3.229    | 0.434 | 1.361    | 1.220 | 2.457    | 1.155 |
| TGFBR3                                          | 1     | 0.160 | 1.593 | 0.186 | 0.859  | 0.093 | 1.334  | 0.151 | 1.398    | 0.187 | 1.886    | 0.479 | 1.296    | 0.100 | 1.051    | 0.413 |
| <b>Inflammatory response</b>                    |       |       |       |       |        |       |        |       |          |       |          |       |          |       |          |       |
| ICAM1                                           | 1     | 0.119 | 1.117 | 0.108 | 1.152  | 0.129 | 1.231  | 0.291 | 2.023    | 0.602 | 14.98    | 4.182 | 1.077    | 0.221 | 3.114    | 1.153 |
| TNFA                                            | 1     | 0.148 | 0.888 | 0.086 | 0.799  | 0.112 | 0.681  | 0.081 | 1.873    | 1.034 | 13.12    | 4.081 | 0.988    | 0.343 | 3.395    | 1.212 |
| TNFRSF1A                                        | 1     | 0.162 | 0.714 | 0.167 | 0.923  | 0.140 | 0.913  | 0.127 | 0.926    | 0.129 | 3.819    | 0.559 | 1.311    | 0.296 | 2.416    | 0.544 |
| VCAM1                                           | 1     | 0.080 | 0.856 | 0.055 | 1.076  | 0.128 | 1.218  | 0.123 | 1.152    | 0.097 | 1.227    | 0.169 | 1.394    | 0.230 | 1.045    | 0.129 |

**Fold change normalized to AL 0h**

| Gene symbol                     | <b>AL 0h</b> |       |              |       | <b>Sham</b>   |       |               |       | <b>tMCAO</b>    |       |                 |       |                 |       |                 |       |
|---------------------------------|--------------|-------|--------------|-------|---------------|-------|---------------|-------|-----------------|-------|-----------------|-------|-----------------|-------|-----------------|-------|
|                                 | <b>AL 0h</b> |       | <b>FA 0h</b> |       | <b>AL 24h</b> |       | <b>FA 24h</b> |       | <b>AL 24h L</b> |       | <b>AL 24h R</b> |       | <b>FA 24h L</b> |       | <b>FA 24h R</b> |       |
|                                 | avg          | sem   | avg          | sem   | avg           | sem   | avg           | sem   | avg             | sem   | avg             | sem   | avg             | sem   | avg             | sem   |
| <b>Cellular stress response</b> |              |       |              |       |               |       |               |       |                 |       |                 |       |                 |       |                 |       |
| APOE                            | 1            | 0.184 | 1.523        | 0.246 | 1.284         | 0.298 | 1.185         | 0.212 | 1.234           | 0.362 | 1.300           | 0.463 | 1.222           | 0.301 | 1.586           | 0.313 |
| GPX1                            | 1            | 0.080 | 1.007        | 0.131 | 0.610         | 0.268 | 0.150         | 0.026 | 0.223           | 0.125 | 0.237           | 0.136 | 0.252           | 0.103 | 0.323           | 0.084 |
| GSTO1                           | 1            | 0.161 | 0.795        | 0.180 | 1.288         | 0.316 | 0.854         | 0.234 | 1.311           | 0.302 | 1.593           | 0.835 | 1.137           | 0.370 | 1.282           | 0.376 |
| HMOX1                           | 1            | 0.095 | 1.061        | 0.105 | 1.104         | 0.098 | 1.068         | 0.067 | 1.507           | 0.288 | 65.42           | 17.53 | 1.920           | 0.682 | 63.45           | 37.83 |
| HMOX2                           | 1            | 0.269 | 0.908        | 0.089 | 1.010         | 0.076 | 0.788         | 0.040 | 1.104           | 0.111 | 0.948           | 0.136 | 1.146           | 0.108 | 0.710           | 0.072 |
| HSPA4                           | 1            | 0.181 | 0.736        | 0.063 | 0.662         | 0.102 | 0.614         | 0.048 | 0.939           | 0.376 | 1.247           | 0.585 | 1.030           | 0.290 | 0.713           | 0.091 |
| HSPA5                           | 1            | 0.141 | 0.809        | 0.064 | 0.858         | 0.041 | 0.726         | 0.092 | 0.976           | 0.113 | 1.242           | 0.153 | 1.154           | 0.276 | 1.206           | 0.185 |
| PTGS2                           | 1            | 0.113 | 1.034        | 0.085 | 0.910         | 0.070 | 0.750         | 0.080 | 1.010           | 0.135 | 1.837           | 0.783 | 0.996           | 0.105 | 1.008           | 0.204 |
| SLC1A3                          | 1            | 0.389 | 0.942        | 0.119 | 0.910         | 0.112 | 0.781         | 0.048 | 0.724           | 0.110 | 0.747           | 0.097 | 0.979           | 0.445 | 1.673           | 0.385 |
| SOD1                            | 1            | 0.245 | 0.591        | 0.091 | 1.788         | 0.280 | 1.656         | 0.260 | 2.813           | 0.726 | 3.418           | 1.134 | 1.427           | 0.286 | 1.888           | 0.369 |
| SOD2                            | 1            | 0.105 | 1.297        | 0.258 | 0.866         | 0.101 | 1.484         | 0.390 | 1.031           | 0.002 | 1.633           | 0.388 | 1.118           | 0.051 | 1.123           | 0.268 |
| <b>Cell death</b>               |              |       |              |       |               |       |               |       |                 |       |                 |       |                 |       |                 |       |
| APAF1                           | 1            | 0.112 | 0.798        | 0.101 | 1.015         | 0.130 | 0.830         | 0.057 | 0.893           | 0.294 | 1.211           | 0.282 | 0.921           | 0.113 | 1.027           | 0.049 |
| BCL2L11                         | 1            | 0.200 | 1.540        | 0.375 | 1.277         | 0.188 | 0.887         | 0.104 | 0.986           | 0.247 | 1.632           | 0.756 | 1.382           | 0.295 | 1.062           | 0.291 |
| FADD                            | 1            | 0.119 | 1.123        | 0.101 | 0.937         | 0.081 | 0.954         | 0.062 | 1.001           | 0.068 | 2.000           | 0.507 | 1.186           | 0.215 | 1.426           | 0.346 |
| HIF1A                           | 1            | 0.091 | 1.298        | 0.244 | 1.077         | 0.166 | 1.058         | 0.106 | 1.100           | 0.132 | 1.175           | 0.152 | 1.516           | 0.534 | 1.228           | 0.397 |
| JUN                             | 1            | 0.371 | 0.783        | 0.157 | 0.627         | 0.084 | 0.554         | 0.074 | 0.681           | 0.112 | 3.441           | 0.682 | 1.224           | 0.500 | 2.134           | 0.658 |
| RALBP1                          | 1            | 0.546 | 0.317        | 0.124 | 0.989         | 0.324 | 1.038         | 0.298 | 1.358           | 1.199 | 2.193           | 1.798 | 0.485           | 0.122 | 0.543           | 0.231 |
| SIRT1                           | 1            | 0.111 | 1.141        | 0.224 | 0.925         | 0.243 | 0.453         | 0.023 | 0.977           | 0.215 | 0.799           | 0.267 | 0.913           | 0.072 | 0.977           | 0.289 |
| TRADD                           | 1            | 0.341 | 0.596        | 0.044 | 0.744         | 0.067 | 0.469         | 0.094 | 0.475           | 0.060 | 1.683           | 0.664 | 1.773           | 0.702 | 0.847           | 0.198 |
| XIAP                            | 1            | 0.265 | 0.878        | 0.048 | 0.917         | 0.107 | 0.850         | 0.095 | 1.258           | 0.329 | 0.738           | 0.127 | 1.151           | 0.227 | 1.467           | 0.779 |

**Supplementary Table 1:**

**Fold change relative to PPIA**

| Gene symbol                                     | Sham    |         |         |         |         |         |         |         |          |         |          |         |          |         |          |         | tMCAO |  |  |  |
|-------------------------------------------------|---------|---------|---------|---------|---------|---------|---------|---------|----------|---------|----------|---------|----------|---------|----------|---------|-------|--|--|--|
|                                                 | AL 0h   |         | FA 0h   |         | AL 24h  |         | FA 24h  |         | AL 24h L |         | AL 24h R |         | FA 24h L |         | FA 24h R |         |       |  |  |  |
|                                                 | avg     | sem     | avg     | sem     | avg     | sem     | avg     | sem     | avg      | sem     | avg      | sem     | avg      | sem     | avg      | sem     |       |  |  |  |
| <b>Neurotrophic and growth factors</b>          |         |         |         |         |         |         |         |         |          |         |          |         |          |         |          |         |       |  |  |  |
| BDNF                                            | 2.7E-06 | 1.2E-06 | 2.8E-06 | 9.7E-07 | 1.3E-06 | 5.5E-07 | 1.2E-06 | 4.3E-07 | 1.4E-06  | 6.8E-07 | 4.5E-05  | 3.3E-05 | 1.6E-05  | 7.2E-06 | 7.9E-06  | 5.6E-06 |       |  |  |  |
| CDNF                                            | 1.7E-04 | 3.4E-05 | 1.5E-04 | 2.1E-05 | 1.3E-04 | 1.8E-05 | 1.4E-04 | 1.9E-05 | 6.2E-05  | 1.5E-05 | 7.0E-05  | 1.5E-05 | 1.4E-04  | 2.0E-05 | 1.3E-04  | 1.6E-05 |       |  |  |  |
| CNTF                                            | 5.4E-05 | 1.8E-05 | 5.5E-05 | 1.5E-05 | 3.1E-05 | 3.4E-06 | 3.0E-05 | 3.6E-06 | 4.3E-05  | 7.9E-06 | 6.2E-05  | 1.5E-05 | 6.2E-05  | 3.3E-05 | 7.0E-05  | 2.3E-05 |       |  |  |  |
| FGF2                                            | 6.0E-03 | 6.1E-04 | 7.6E-03 | 7.0E-04 | 5.9E-03 | 5.2E-04 | 6.4E-03 | 4.6E-04 | 1.1E-02  | 2.2E-03 | 3.4E-02  | 2.4E-03 | 1.1E-02  | 2.0E-03 | 1.6E-02  | 2.9E-03 |       |  |  |  |
| GDNF                                            | 3.6E-02 | 3.4E-03 | 3.2E-02 | 2.5E-03 | 3.6E-02 | 3.2E-03 | 3.4E-02 | 3.5E-03 | 4.9E-02  | 8.8E-03 | 7.5E-02  | 1.3E-02 | 3.2E-02  | 4.8E-03 | 3.3E-02  | 4.6E-03 |       |  |  |  |
| IGF1                                            | 6.1E-04 | 7.6E-05 | 5.8E-04 | 7.5E-05 | 5.6E-04 | 5.4E-05 | 5.3E-04 | 7.4E-05 | 6.3E-04  | 1.3E-04 | 8.6E-04  | 2.2E-04 | 8.0E-04  | 2.1E-04 | 8.8E-04  | 1.0E-04 |       |  |  |  |
| MANF                                            | 2.9E-02 | 1.4E-03 | 2.7E-02 | 1.3E-03 | 3.0E-02 | 1.8E-03 | 2.8E-02 | 1.3E-03 | 3.3E-02  | 5.3E-03 | 5.9E-02  | 4.9E-03 | 3.3E-02  | 3.1E-03 | 4.2E-02  | 6.6E-03 |       |  |  |  |
| NGF                                             | 9.9E-05 | 2.0E-05 | 6.7E-05 | 9.2E-06 | 5.1E-05 | 1.2E-05 | 4.9E-05 | 7.8E-06 | 6.9E-05  | 2.1E-05 | 7.7E-05  | 1.5E-05 | 3.8E-05  | 8.7E-06 | 8.6E-05  | 3.8E-05 |       |  |  |  |
| NRG1                                            | 1.7E-04 | 2.4E-05 | 1.3E-04 | 1.0E-05 | 1.2E-04 | 2.7E-05 | 1.3E-04 | 2.5E-05 | 8.9E-05  | 2.5E-05 | 5.8E-05  | 1.9E-05 | 1.2E-04  | 2.0E-05 | 9.4E-05  | 5.3E-05 |       |  |  |  |
| NRTN                                            | 1.1E-03 | 1.8E-04 | 9.6E-04 | 8.8E-05 | 1.1E-03 | 1.4E-04 | 1.1E-03 | 1.5E-04 | 1.2E-03  | 4.4E-05 | 7.2E-03  | 1.3E-03 | 1.3E-03  | 2.4E-04 | 3.3E-03  | 1.3E-03 |       |  |  |  |
| PSPN                                            | 1.5E-04 | 4.5E-05 | 8.4E-05 | 1.1E-05 | 1.1E-04 | 1.2E-05 | 1.1E-04 | 1.8E-05 | 1.3E-04  | 4.4E-05 | 1.4E-04  | 4.6E-05 | 1.0E-04  | 3.1E-05 | 1.5E-04  | 1.7E-05 |       |  |  |  |
| TGFB1                                           | 1.0E-01 | 1.4E-02 | 8.0E-02 | 6.0E-03 | 8.8E-02 | 8.6E-03 | 8.0E-02 | 4.2E-03 | 8.7E-02  | 3.0E-03 | 5.4E-01  | 8.1E-02 | 1.4E-01  | 3.2E-02 | 1.9E-01  | 5.9E-02 |       |  |  |  |
| <b>Neurotrophic and growth factor receptors</b> |         |         |         |         |         |         |         |         |          |         |          |         |          |         |          |         |       |  |  |  |
| GFRA1                                           | 4.7E-03 | 8.8E-04 | 4.5E-03 | 4.6E-04 | 5.2E-03 | 1.1E-03 | 4.0E-03 | 4.0E-04 | 5.0E-03  | 7.1E-04 | 1.4E-02  | 1.4E-03 | 6.8E-03  | 1.3E-03 | 8.8E-03  | 1.7E-03 |       |  |  |  |
| GFRA2                                           | 4.2E-04 | 6.0E-05 | 1.0E-03 | 6.4E-04 | 2.9E-04 | 1.9E-05 | 4.4E-04 | 1.2E-04 | 3.3E-04  | 4.7E-05 | 3.5E-04  | 1.5E-04 | 7.8E-04  | 5.0E-04 | 3.6E-04  | 1.4E-04 |       |  |  |  |
| NTRK2                                           | 2.4E-03 | 9.9E-05 | 2.9E-03 | 5.0E-04 | 2.6E-03 | 2.4E-04 | 3.4E-03 | 2.5E-04 | 3.9E-03  | 1.9E-04 | 3.8E-03  | 9.0E-04 | 4.7E-03  | 1.8E-03 | 3.0E-03  | 9.1E-04 |       |  |  |  |
| RET                                             | 1.3E-02 | 2.1E-03 | 1.6E-02 | 3.0E-03 | 1.1E-02 | 7.3E-04 | 1.4E-02 | 1.4E-03 | 2.1E-02  | 3.8E-03 | 5.5E-02  | 1.1E-02 | 2.3E-02  | 3.0E-03 | 4.8E-02  | 1.5E-02 |       |  |  |  |
| TGFBR1                                          | 1.2E-03 | 1.7E-04 | 7.4E-04 | 9.5E-05 | 1.1E-03 | 1.0E-04 | 9.6E-04 | 8.0E-05 | 1.1E-03  | 1.6E-04 | 2.2E-03  | 2.1E-04 | 1.2E-03  | 1.6E-04 | 1.6E-03  | 3.0E-04 |       |  |  |  |
| TGFBR2                                          | 3.2E-03 | 4.6E-04 | 2.7E-03 | 3.1E-04 | 4.4E-03 | 9.6E-04 | 4.0E-03 | 7.5E-04 | 3.4E-03  | 2.9E-04 | 1.0E-02  | 1.4E-03 | 4.3E-03  | 3.9E-03 | 7.8E-03  | 3.7E-03 |       |  |  |  |
| TGFBR3                                          | 4.4E-04 | 7.0E-05 | 7.0E-04 | 8.2E-05 | 3.8E-04 | 4.1E-05 | 5.9E-04 | 6.6E-05 | 6.1E-04  | 8.2E-05 | 8.3E-04  | 2.1E-04 | 5.7E-04  | 4.4E-05 | 4.6E-04  | 1.8E-04 |       |  |  |  |
| <b>Inflammatory response</b>                    |         |         |         |         |         |         |         |         |          |         |          |         |          |         |          |         |       |  |  |  |
| ICAM1                                           | 1.2E-04 | 1.5E-05 | 1.4E-04 | 1.3E-05 | 1.4E-04 | 1.6E-05 | 1.5E-04 | 3.6E-05 | 2.5E-04  | 7.5E-05 | 1.9E-03  | 5.2E-04 | 1.3E-04  | 2.8E-05 | 3.9E-04  | 1.4E-04 |       |  |  |  |
| TNFA                                            | 3.1E-05 | 4.6E-06 | 2.7E-05 | 2.6E-06 | 2.5E-05 | 3.5E-06 | 2.1E-05 | 2.5E-06 | 5.8E-05  | 3.2E-05 | 4.1E-04  | 1.3E-04 | 3.0E-05  | 1.1E-05 | 1.0E-04  | 3.7E-05 |       |  |  |  |
| TNFRSF1A                                        | 4.5E-03 | 7.3E-04 | 3.2E-03 | 7.6E-04 | 4.2E-03 | 6.3E-04 | 4.1E-03 | 5.8E-04 | 4.2E-03  | 5.9E-04 | 1.7E-02  | 2.5E-03 | 5.9E-03  | 1.3E-03 | 1.1E-02  | 2.5E-03 |       |  |  |  |
| VCAM1                                           | 1.2E+00 | 9.7E-02 | 1.0E+00 | 6.7E-02 | 1.3E+00 | 1.5E-01 | 1.5E+00 | 1.5E-01 | 1.4E+00  | 1.2E-01 | 1.5E+00  | 2.0E-01 | 1.7E+00  | 2.8E-01 | 1.3E+00  | 1.6E-01 |       |  |  |  |

**Fold change relative to PPIA**

| Gene symbol                     |         |         |         |         | Sham    |         |         |         | tMCAO    |         |          |         |          |         |          |         |
|---------------------------------|---------|---------|---------|---------|---------|---------|---------|---------|----------|---------|----------|---------|----------|---------|----------|---------|
|                                 | AL 0h   |         | FA 0h   |         | AL 24h  |         | FA 24h  |         | AL 24h L |         | AL 24h R |         | FA 24h L |         | FA 24h R |         |
|                                 | avg     | sem     | avg     | sem     | avg     | sem     | avg     | sem     | avg      | sem     | avg      | sem     | avg      | sem     | avg      | sem     |
| <b>Cellular stress response</b> |         |         |         |         |         |         |         |         |          |         |          |         |          |         |          |         |
| APOE                            | 4.8E-01 | 8.9E-02 | 7.4E-01 | 1.2E-01 | 6.2E-01 | 1.4E-01 | 5.7E-01 | 1.0E-01 | 6.0E-01  | 1.8E-01 | 6.3E-01  | 2.2E-01 | 5.9E-01  | 1.5E-01 | 7.7E-01  | 1.5E-01 |
| GPX1                            | 3.5E-02 | 2.8E-03 | 3.5E-02 | 4.6E-03 | 2.1E-02 | 9.5E-03 | 5.3E-03 | 9.2E-04 | 7.9E-03  | 4.4E-03 | 8.4E-03  | 4.8E-03 | 8.9E-03  | 3.6E-03 | 1.1E-02  | 3.0E-03 |
| GSTO1                           | 6.6E-05 | 1.1E-05 | 5.3E-05 | 1.2E-05 | 8.5E-05 | 2.1E-05 | 5.7E-05 | 1.5E-05 | 8.7E-05  | 2.0E-05 | 1.1E-04  | 5.5E-05 | 7.5E-05  | 2.5E-05 | 8.5E-05  | 2.5E-05 |
| HMOX1                           | 7.5E-05 | 7.1E-06 | 7.9E-05 | 7.9E-06 | 8.3E-05 | 7.3E-06 | 8.0E-05 | 5.0E-06 | 1.1E-04  | 2.2E-05 | 4.9E-03  | 1.3E-03 | 1.4E-04  | 5.1E-05 | 4.8E-03  | 2.8E-03 |
| HMOX2                           | 3.2E-02 | 8.7E-03 | 2.9E-02 | 2.9E-03 | 3.3E-02 | 2.5E-03 | 2.5E-02 | 1.3E-03 | 3.6E-02  | 3.6E-03 | 3.1E-02  | 4.4E-03 | 3.7E-02  | 3.5E-03 | 2.3E-02  | 2.3E-03 |
| HSPA4                           | 1.3E-02 | 2.3E-03 | 9.2E-03 | 7.9E-04 | 8.3E-03 | 1.3E-03 | 7.7E-03 | 6.0E-04 | 1.2E-02  | 4.7E-03 | 1.6E-02  | 7.3E-03 | 1.3E-02  | 3.6E-03 | 8.9E-03  | 1.1E-03 |
| HSPA5                           | 1.0E-01 | 1.4E-02 | 8.3E-02 | 6.5E-03 | 8.8E-02 | 4.2E-03 | 7.4E-02 | 9.4E-03 | 1.0E-01  | 1.1E-02 | 1.3E-01  | 1.6E-02 | 1.2E-01  | 2.8E-02 | 1.2E-01  | 1.9E-02 |
| PTGS2                           | 5.8E-03 | 6.6E-04 | 6.0E-03 | 5.0E-04 | 5.3E-03 | 4.1E-04 | 4.4E-03 | 4.7E-04 | 5.9E-03  | 7.9E-04 | 1.1E-02  | 4.6E-03 | 5.8E-03  | 6.1E-04 | 5.9E-03  | 1.2E-03 |
| SLC1A3                          | 9.0E-03 | 3.5E-03 | 8.4E-03 | 1.1E-03 | 8.2E-03 | 1.0E-03 | 7.0E-03 | 4.3E-04 | 6.5E-03  | 9.9E-04 | 6.7E-03  | 8.7E-04 | 8.8E-03  | 4.0E-03 | 1.5E-02  | 3.5E-03 |
| SOD1                            | 3.7E-03 | 9.0E-04 | 2.2E-03 | 3.3E-04 | 6.6E-03 | 1.0E-03 | 6.1E-03 | 9.6E-04 | 1.0E-02  | 2.7E-03 | 1.3E-02  | 4.2E-03 | 5.2E-03  | 1.1E-03 | 6.9E-03  | 1.4E-03 |
| SOD2                            | 2.6E-01 | 2.8E-02 | 3.4E-01 | 6.8E-02 | 2.3E-01 | 2.6E-02 | 3.9E-01 | 1.0E-01 | 2.7E-01  | 5.2E-04 | 4.3E-01  | 1.0E-01 | 2.9E-01  | 1.3E-02 | 2.9E-01  | 7.0E-02 |
| <b>Cell death</b>               |         |         |         |         |         |         |         |         |          |         |          |         |          |         |          |         |
| APAF1                           | 7.6E-04 | 8.5E-05 | 6.1E-04 | 7.7E-05 | 7.7E-04 | 9.9E-05 | 6.3E-04 | 4.4E-05 | 6.8E-04  | 2.2E-04 | 9.2E-04  | 2.1E-04 | 7.0E-04  | 8.6E-05 | 7.8E-04  | 3.7E-05 |
| BCL2L11                         | 7.4E-05 | 1.5E-05 | 1.1E-04 | 2.8E-05 | 9.5E-05 | 1.4E-05 | 6.6E-05 | 7.8E-06 | 7.3E-05  | 1.8E-05 | 1.2E-04  | 5.6E-05 | 1.0E-04  | 2.2E-05 | 7.9E-05  | 2.2E-05 |
| FADD                            | 1.2E-03 | 1.5E-04 | 1.4E-03 | 1.3E-04 | 1.2E-03 | 1.0E-04 | 1.2E-03 | 7.8E-05 | 1.2E-03  | 8.5E-05 | 2.5E-03  | 6.3E-04 | 1.5E-03  | 2.7E-04 | 1.8E-03  | 4.3E-04 |
| HIF1A                           | 1.1E-02 | 1.0E-03 | 1.5E-02 | 2.8E-03 | 1.2E-02 | 1.9E-03 | 1.2E-02 | 1.2E-03 | 1.2E-02  | 1.5E-03 | 1.3E-02  | 1.7E-03 | 1.7E-02  | 6.0E-03 | 1.4E-02  | 4.5E-03 |
| JUN                             | 3.4E-03 | 1.3E-03 | 2.7E-03 | 5.4E-04 | 2.2E-03 | 2.9E-04 | 1.9E-03 | 2.5E-04 | 2.3E-03  | 3.9E-04 | 1.2E-02  | 2.3E-03 | 4.2E-03  | 1.7E-03 | 7.3E-03  | 2.3E-03 |
| RALBP1                          | 1.2E-04 | 6.4E-05 | 3.7E-05 | 1.4E-05 | 1.2E-04 | 3.8E-05 | 1.2E-04 | 3.5E-05 | 1.6E-04  | 1.4E-04 | 2.6E-04  | 2.1E-04 | 5.7E-05  | 1.4E-05 | 6.3E-05  | 2.7E-05 |
| SIRT1                           | 1.0E-04 | 1.1E-05 | 1.1E-04 | 2.3E-05 | 9.3E-05 | 2.4E-05 | 4.5E-05 | 2.3E-06 | 9.8E-05  | 2.2E-05 | 8.0E-05  | 2.7E-05 | 9.2E-05  | 7.2E-06 | 9.8E-05  | 2.9E-05 |
| TRADD                           | 4.8E-04 | 1.6E-04 | 2.8E-04 | 2.1E-05 | 3.5E-04 | 3.2E-05 | 2.2E-04 | 4.5E-05 | 2.3E-04  | 2.9E-05 | 8.0E-04  | 3.2E-04 | 8.5E-04  | 3.3E-04 | 4.0E-04  | 9.4E-05 |
| XIAP                            | 4.0E-04 | 1.1E-04 | 3.5E-04 | 1.9E-05 | 3.7E-04 | 4.3E-05 | 3.4E-04 | 3.8E-05 | 5.0E-04  | 1.3E-04 | 2.9E-04  | 5.1E-05 | 4.6E-04  | 9.1E-05 | 5.9E-04  | 3.1E-04 |

**Supplementary Table 1:****Statistics**

| <b>Gene symbol</b>                              | <b>AL 0h vs FA 0h<br/>(Student's t-test)</b> | <b>tMCAO AL<br/>24h L vs R</b> | <b>tMCAO AL 24h L vs<br/>tMCAO FA 24h L</b> | <b>tMCAO FA<br/>24h L vs R</b> | <b>tMCAO AL 24h R vs<br/>tMCAO FA 24h R</b> |
|-------------------------------------------------|----------------------------------------------|--------------------------------|---------------------------------------------|--------------------------------|---------------------------------------------|
| <b>Neurotrophic and growth factors</b>          |                                              |                                |                                             |                                |                                             |
| BDNF                                            | 0.947                                        | ns                             | ns                                          | ns                             | ns                                          |
| CDNF                                            | 0.624                                        | ns                             | ns                                          | ns                             | ns                                          |
| CNTF                                            | 0.997                                        | ns                             | ns                                          | ns                             | ns                                          |
| FGF2                                            | 0.107                                        | <0.001                         | ns                                          | ns                             | <0.001                                      |
| GDNF                                            | 0.354                                        | 0.047                          | ns                                          | ns                             | 0.002                                       |
| IGF1                                            | 0.772                                        | ns                             | ns                                          | ns                             | ns                                          |
| MANF                                            | 0.375                                        | 0.004                          | ns                                          | ns                             | 0.038                                       |
| NGF                                             | 0.181                                        | ns                             | ns                                          | ns                             | ns                                          |
| NRG1                                            | 0.138                                        | ns                             | ns                                          | ns                             | ns                                          |
| NRTN                                            | 0.416                                        | <0.001                         | ns                                          | ns                             | 0.009                                       |
| PSPN                                            | 0.189                                        | ns                             | ns                                          | ns                             | ns                                          |
| TGFB1                                           | 0.209                                        | <0.001                         | ns                                          | ns                             | <0.001                                      |
| <b>Neurotrophic and growth factor receptors</b> |                                              |                                |                                             |                                |                                             |
| GFRA1                                           | 0.855                                        | <0.001                         | ns                                          | ns                             | 0.026                                       |
| GFRA2                                           | 0.397                                        | ns                             | ns                                          | ns                             | ns                                          |
| NTRK2                                           | 0.446                                        | ns                             | ns                                          | ns                             | ns                                          |
| RET                                             | 0.409                                        | ns                             | ns                                          | ns                             | ns                                          |
| TGFBR1                                          | 0.054                                        | 0.004                          | ns                                          | ns                             | ns                                          |
| TGFBR2                                          | 0.384                                        | ns                             | ns                                          | ns                             | ns                                          |
| TGFBR3                                          | 0.053                                        | ns                             | ns                                          | ns                             | ns                                          |
| <b>Inflammatory response</b>                    |                                              |                                |                                             |                                |                                             |
| ICAM1                                           | 0.476                                        | <0.05                          | ns                                          | ns                             | <0.05                                       |
| TNFA                                            | 0.522                                        | <0.05                          | ns                                          | ns                             | <0.05                                       |
| TNFRSF1A                                        | 0.234                                        | <0.001                         | ns                                          | ns                             | 0.034                                       |
| VCAM1                                           | 0.157                                        | ns                             | ns                                          | ns                             | ns                                          |

**Statistics**

| <b>Gene symbol</b>              | <b>AL 0h vs FA 0h<br/>(Student's t-test)</b> | <b>tMCAO AL<br/>24h L vs R</b> | <b>tMCAO AL 24h L vs<br/>tMCAO FA 24h L</b> | <b>tMCAO FA<br/>24h L vs R</b> | <b>tMCAO AL 24h R vs<br/>tMCAO FA 24h R</b> |
|---------------------------------|----------------------------------------------|--------------------------------|---------------------------------------------|--------------------------------|---------------------------------------------|
| <b>Cellular stress response</b> |                                              |                                |                                             |                                |                                             |
| APOE                            | 0.107                                        | ns                             | ns                                          | ns                             | ns                                          |
| GPX1                            | 0.963                                        | ns                             | ns                                          | ns                             | ns                                          |
| GSTO1                           | 0.407                                        | ns                             | ns                                          | ns                             | ns                                          |
| HMOX1                           | 0.673                                        | 0.007                          | ns                                          | ns                             | ns                                          |
| HMOX2                           | 0.792                                        | ns                             | ns                                          | ns                             | ns                                          |
| HSPA4/HSP70                     | 0.198                                        | ns                             | ns                                          | ns                             | ns                                          |
| HSPA5/GRP78                     | 0.259                                        | ns                             | ns                                          | ns                             | ns                                          |
| PTGS2/COX2                      | 0.814                                        | ns                             | ns                                          | ns                             | ns                                          |

|              |       |    |    |    |    |
|--------------|-------|----|----|----|----|
| SLC1A3/GLAST | 0.890 | ns | ns | ns | ns |
| SOD1         | 0.161 | ns | ns | ns | ns |
| SOD2         | 0.347 | ns | ns | ns | ns |

**Cell death**

|         |       |       |    |    |    |
|---------|-------|-------|----|----|----|
| APAF1   | 0.210 | ns    | ns | ns | ns |
| BCL2L11 | 0.242 | ns    | ns | ns | ns |
| FADD    | 0.441 | ns    | ns | ns | ns |
| HIF1A   | 0.281 | ns    | ns | ns | ns |
| JUN     | 0.621 | 0.003 | ns | ns | ns |
| RALBP1  | 0.250 | ns    | ns | ns | ns |
| SIRT1   | 0.589 | ns    | ns | ns | ns |
| TRADD   | 0.227 | ns    | ns | ns | ns |
| XIAP    | 0.661 | ns    | ns | ns | ns |
